# Supplementary material for: Combined use of protein biomarkers and network analysis unveils deregulated regulatory circuits in Duchenne muscular dystrophy
Source: PubMed Central journal article supplement (PMC5846794; doi:10.1371/journal.pone.0194225), 2018-03-12
Supplement: pone.0194225.s001.pdf [file pone.0194225.s001.pdf]

**Table S1.** Tissue-specificity of proteins in the long biomarker panel. The data were retrieved from Human Protein Atlas

| Entrez Gene Symbol | Subcellular location                                 | RNA tissue category | RNA TS FPKM                                                    | FPKM max in non specific |
|--------------------|------------------------------------------------------|---------------------|----------------------------------------------------------------|--------------------------|
| ALCAM              | Cytoplasm                                            | Mixed               |                                                                | lung: 70.9               |
| ANP32B             |                                                      | Expressed in all    |                                                                | tonsil: 112.1            |
| CA3                |                                                      | Tissue enriched     | skeletal muscle: 1438.4                                        | prostate: 107.8          |
| CADM1              | Cell Junctions                                       | Mixed               |                                                                | lung: 63.4               |
| CAMK2A             |                                                      | Group enriched      | cerebral cortex: 134.7;skeletal muscle: 69.2                   | heart muscle: 8.8        |
| CAMK2B             |                                                      | Group enriched      | cerebral cortex: 99.4;heart muscle: 47.0;skeletal muscle: 44.9 | adrenal gland: 10.5      |
| CAMK2D             |                                                      | Expressed in all    |                                                                | heart muscle: 129.3      |
| CD109              |                                                      | Mixed               |                                                                | skin: 16.1               |
| CD200R1            |                                                      | Mixed               |                                                                | spleen: 8.4              |
| CD55               | Nucleus                                              | Expressed in all    |                                                                | lung: 222.3              |
| CD86               |                                                      | Mixed               |                                                                | appendix: 35.3           |
| CDH5               |                                                      | Tissue enhanced     | placenta: 137.9                                                | lung: 84.1               |
| CKB                |                                                      | Expressed in all    |                                                                | prostate: 589.1          |
| CKM                |                                                      | Tissue enriched     | skeletal muscle: 8139.3                                        | heart muscle: 1172.1     |
| CX3CL1             | Plasma membrane                                      | Mixed               |                                                                | lung: 54.3               |
| DNAJC19            |                                                      | Expressed in all    |                                                                | kidney: 35.6             |
| EGFR               | Plasma membrane, Cytoplasm                           | Tissue enhanced     | placenta: 91.3                                                 | skin: 43.2               |
| ENG                | Nucleus but not nucleoli, Cytoplasm                  | Expressed in all    |                                                                | heart muscle: 127.7      |
| FABP3              | Golgi apparatus                                      | Group enriched      | heart muscle: 2098.6;skeletal muscle: 459.8                    | kidney: 135.5            |
| FAP                |                                                      | Tissue enhanced     | endometrium: 37.1                                              | smooth muscle: 28.3      |
| FASLG              |                                                      | Tissue enhanced     | lymph node: 4.9                                                | spleen: 3.1              |
| FGA                |                                                      | Tissue enriched     | liver: 4181.2                                                  | stomach: 28.1            |
| FGB                |                                                      | Tissue enriched     | liver: 4244.6                                                  | kidney: 23.5             |
| FGG                |                                                      | Tissue enriched     | liver: 3876.1                                                  | lung: 30.0               |
| GDF11              |                                                      | Mixed               |                                                                | cerebral cortex: 7.9     |
| GPI                | Plasma membrane, Cytoplasm, Nucleus but not nucleoli | Expressed in all    |                                                                | heart muscle: 256.2      |
| GPT                |                                                      | Tissue enhanced     | liver: 64.6                                                    | skeletal muscle: 35.0    |
| GSN                | Cytoskeleton (Actin filaments)                       | Expressed in all    |                                                                | adipose tissue: 776.7    |

|          |                                      |                  |                                              |                        |
|----------|--------------------------------------|------------------|----------------------------------------------|------------------------|
| HDGFRP2  | Nucleus but not nucleoli             | Expressed in all |                                              | testis: 37.1           |
| IGF1R    | Vesicles                             | Expressed in all |                                              | fallopian tube: 18.8   |
| IL18BP   | Nuclear membrane                     | Expressed in all |                                              | spleen: 49.8           |
| JAG1     | Plasma membrane, Golgi apparatus     | Expressed in all |                                              | placenta: 42.0         |
| KIT      |                                      | Mixed            |                                              | thyroid gland: 46.5    |
| LDHB     | Cytoplasm                            | Expressed in all |                                              | heart muscle: 1123.5   |
| MAPK12   | Nucleus but not nucleoli, Cytoplasm  | Tissue enriched  | skeletal muscle: 107.8                       | cerebral cortex: 13.0  |
| MB       |                                      | Group enriched   | heart muscle: 3937.4;skeletal muscle: 5728.1 | esophagus: 467.7       |
| MDH1     | Centrosome, Cytoplasm                | Expressed in all |                                              | heart muscle: 872.8    |
| NOTCH1   |                                      | Expressed in all |                                              | skin: 16.4             |
| PIK3CA   | Cytoplasm                            | Expressed in all |                                              | adipose tissue: 18.0   |
| PIK3R1   | Cytoplasm                            | Expressed in all |                                              | fallopian tube: 83.8   |
| PLA2G2A  |                                      | Tissue enhanced  | rectum: 651.2;small intestine: 869.9         | colon: 566.9           |
| PLAT     | Cytoskeleton (Actin filaments)       | Mixed            |                                              | urinary bladder: 122.2 |
| PROC     |                                      | Tissue enriched  | liver: 170.7                                 | kidney: 18.9           |
| PSPN     |                                      | Not detected     |                                              | fallopian tube: 0.9    |
| RELT     | Nucleus but not nucleoli             | Tissue enhanced  | bone marrow: 61.4                            | spleen: 14.1           |
| RET      | Plasma membrane, Cytoplasm, Vesicles | Tissue enriched  | adrenal gland: 18.7                          | salivary gland: 3.6    |
| RPS7     | Cytoplasm, Nucleus                   | Expressed in all |                                              | ovary: 120.4           |
| SEMA6A   |                                      | Expressed in all |                                              | placenta: 39.9         |
| TNFRSF17 |                                      | Tissue enhanced  | tonsil: 41.8                                 | lymph node: 26.1       |
| TPM2     |                                      | Tissue enriched  | skeletal muscle: 6561.6                      | smooth muscle: 981.0   |
| TNNI2    |                                      | Tissue enriched  | skeletal muscle: 2919.8                      | esophagus: 101.6       |
| TNNI3    |                                      | Tissue enriched  | heart muscle: 2157.7                         | skeletal muscle: 6.6   |
