# Supplementary material for: Combined use of protein biomarkers and network analysis unveils deregulated regulatory circuits in Duchenne muscular dystrophy
Source: PubMed Central journal article supplement (PMC5846794; doi:10.1371/journal.pone.0194225), 2018-03-12
Supplement: pone.0194225.s002.pdf [file pone.0194225.s002.pdf]

**Table S2.** Association with age in disease. For all the proteins in the long biomarker panel the results of the association analysis with age are shown.

| somalogicID | UniProt ID                 | beta         | 95% CI        | p-value     | BH adjusted p-value |
|-------------|----------------------------|--------------|---------------|-------------|---------------------|
| 2212-69 1   | P00750                     | 0.00592591   | -0.01 - 0.02  | 0.490943781 | 0.554979926         |
| 2475-1 3    | P10721                     | 0.019586947  | -0.01 - 0.05  | 0.195151004 | 0.263959597         |
| 2665-26 2   | Q02223                     | 0.019505418  | -0.01 - 0.05  | 0.184432396 | 0.259202286         |
| 2670-67 4   | P06732                     | -0.271044409 | -0.32 - -0.22 | 8.04E-14    | 2.09E-12            |
| 2677-1 1    | P00533                     | -0.008898478 | -0.02 - 0     | 0.197969698 | 0.263959597         |
| 2692-74 2   | P14555                     | -0.041494073 | -0.07 - -0.02 | 0.001323199 | 0.002752254         |
| 2696-87 2   | O60542                     | 0.035368415  | 0.02 - 0.05   | 3.65E-05    | 9.04E-05            |
| 2765-4 3    | O95390                     | -0.032037144 | -0.05 - -0.02 | 0.000322126 | 0.00069794          |
| 2796-62 2   | P02671<br>P02675<br>P02679 | -0.114518085 | -0.14 - -0.09 | 1.77E-12    | 1.53E-11            |
| 2819-23 2   | P33151                     | -0.008385133 | -0.03 - 0.01  | 0.427218744 | 0.493674993         |
| 2827-23 2   | P78423                     | 0.010143189  | -0.01 - 0.03  | 0.214908063 | 0.279380482         |
| 2961-1 2    | P04070                     | -0.005874716 | -0.02 - 0.01  | 0.405623099 | 0.490520957         |
| 3042-7 2    | P02144                     | -0.217872215 | -0.27 - -0.17 | 1.22E-10    | 5.29E-10            |
| 3052-8 2    | P48023                     | 0.0013531    | -0.02 - 0.02  | 0.895872861 | 0.931707775         |
| 3073-51 2   | O95998                     | 0.020710804  | 0 - 0.05      | 0.101651249 | 0.151024713         |
| 3220-40 2   | P07949                     | -0.001761371 | -0.02 - 0.02  | 0.841590236 | 0.907060691         |
| 3290-50 2   | Q6YHK3                     | -0.016176836 | -0.04 - 0     | 0.100895987 | 0.151024713         |
| 3326-58 2   | Q9BY67                     | -0.01906117  | -0.03 - 0     | 0.015829787 | 0.029398176         |
| 3350-53 2   | Q9UQM7                     | -0.169821224 | -0.2 - -0.14  | 6.43E-13    | 8.35E-12            |
| 3351-1 1    | Q13554                     | -0.16601308  | -0.2 - -0.13  | 2.85E-12    | 2.12E-11            |
| 3390-72 2   | P42336<br>P27986           | -0.038556529 | -0.05 - -0.02 | 1.23E-06    | 3.36E-06            |
| 3419-49 2   | Q13557                     | -0.167948601 | -0.2 - -0.13  | 1.45E-12    | 1.51E-11            |
| 3709-4 2    | P24298                     | -0.141795372 | -0.17 - -0.12 | 4.79E-14    | 2.09E-12            |
| 3714-49 2   | P12277<br>P06732           | -0.24070904  | -0.29 - -0.19 | 4.64E-12    | 2.91E-11            |
| 3799-11 2   | P07451                     | -0.174228926 | -0.21 - -0.13 | 5.15E-11    | 2.68E-10            |
| 3853-56 1   | P40925                     | -0.137400423 | -0.19 - -0.09 | 2.34E-06    | 6.08E-06            |
| 3864-5 2    | P62081                     | -0.039990492 | -0.07 - -0.01 | 0.002756042 | 0.005307933         |
| 3890-8 2    | P07195                     | -0.180194502 | -0.21 - -0.15 | 3.09E-13    | 5.36E-12            |
| 4179-57 3   | None                       | -0.139081504 | -0.17 - -0.11 | 6.80E-11    | 3.21E-10            |
| 4194-26 3   | Q92688                     | -0.103240878 | -0.13 - -0.07 | 7.12E-09    | 2.65E-08            |
| 4232-19 2   | P08069                     | 0.005811017  | -0.01 - 0.02  | 0.426417853 | 0.493674993         |
| 4272-46 2   | P06744                     | -0.17936364  | -0.23 - -0.13 | 1.81E-09    | 7.26E-09            |
| 4472-5 2    | P07951                     | -0.035088943 | -0.05 - -0.02 | 0.000111055 | 0.000262493         |
| 4545-53 3   | Q96DA6                     | -0.008426035 | -0.01 - 0     | 0.001798259 | 0.003596518         |
| 4553-65 3   | Q7Z4V5                     | -0.004742399 | -0.01 - 0     | 0.061088871 | 0.096261251         |
| 4696-2 2    | P05413                     | -0.159821307 | -0.21 - -0.11 | 1.19E-08    | 3.86E-08            |
| 4775-34 3   | P06396                     | -0.01707174  | -0.03 - 0     | 0.028658223 | 0.048071857         |
| 4907-56 1   | P02671<br>P02675           | -0.084408669 | -0.11 - -0.06 | 5.37E-08    | 1.55E-07            |

|           |        |              |               |             |             |
|-----------|--------|--------------|---------------|-------------|-------------|
|           | P02679 |              |               |             |             |
| 4908-6 1  | P17813 | 0.004098797  | -0.01 - 0.02  | 0.660989501 | 0.731307533 |
| 4989-7 1  | P02679 | -0.103815798 | -0.13 - -0.07 | 2.15E-08    | 6.58E-08    |
| 5005-4 1  | P53778 | -0.162143993 | -0.2 - -0.13  | 5.04E-12    | 2.91E-11    |
| 5029-3 1  | Q12884 | -0.039854512 | -0.06 - -0.02 | 0.000274953 | 0.000621632 |
| 5069-9 3  | P08174 | -0.000403626 | -0.02 - 0.02  | 0.963563838 | 0.982457247 |
| 5092-51 3 | P78504 | 0.013331932  | 0 - 0.03      | 0.056702156 | 0.092141004 |
| 5103-30 3 | Q8TD46 | 0.005680319  | -0.01 - 0.02  | 0.327226479 | 0.405137545 |
| 5107-7 2  | P46531 | -0.008233286 | -0.02 - 0.01  | 0.229024104 | 0.290469596 |
| 5115-31 3 | Q969Z4 | -0.000962443 | -0.01 - 0.01  | 0.854730267 | 0.907060691 |
| 5122-92 2 | Q9H2E6 | 0.019390314  | 0 - 0.04      | 0.023930753 | 0.041479972 |
| 5337-64 3 | P42081 | 0.000176201  | -0.02 - 0.02  | 0.982558427 | 0.982558427 |
| 5440-26 3 | P48788 | -0.146286043 | -0.19 - -0.11 | 7.81E-09    | 2.71E-08    |
| 5441-67 3 | P19429 | -0.035135993 | -0.06 - -0.01 | 0.017318128 | 0.031053195 |
| 5451-1 3  | Q13740 | -0.011415572 | -0.03 - 0.01  | 0.183925477 | 0.259202286 |
