# Supplementary material for: Combined use of protein biomarkers and network analysis unveils deregulated regulatory circuits in Duchenne muscular dystrophy
Source: PubMed Central journal article supplement (PMC5846794; doi:10.1371/journal.pone.0194225), 2018-03-12
Supplement: pone.0194225.s003.pdf [file pone.0194225.s003.pdf]

**Table S3.** NASFinder results. For each pathway that resulted overrepresented the genes in the corresponding sub-network are reported.

| KEGG PATHWAYS IN<br>CANCER | KEGG GLIOMA | KEGG<br>NEUTROPHIN<br>SIGNALING<br>PATHWAY | REACTOME IMMUNE<br>SYSTEM | REACTOME<br>HEMOSTASIS | HALLMARK<br>MYOGENESIS | BIOCARTA AMI<br>PATHWAY | BIOCARTA CREB<br>PATHWAY | BIOCARTA BAD<br>PATHWAY |
|----------------------------|-------------|--------------------------------------------|---------------------------|------------------------|------------------------|-------------------------|--------------------------|-------------------------|
| JUN                        | IGF1R       | NFKB1                                      | PTK2B                     | CDK2                   | TNNI2                  | PROS1                   | CAMK2A                   | IGF1R                   |
| STAT3                      | MDM2        | MAPK12                                     | IFNG                      | SH2B2                  | CKM                    | FGG                     | CAMK2B                   | KIT                     |
| IGF1R                      | EGFR        | CAMK2A                                     | IL1B                      | EP300                  | TPM2                   | PROC                    | CAMK2D                   | PIK3CA                  |
| LAMC2                      | PTEN        | CAMK2B                                     | IRF6                      | F2                     | FABP3                  | FGA                     | AKT1                     | PIK3R1                  |
| ARNT                       | CAMK2A      | CAMK2D                                     | MEF2C                     | FGA                    | MAPK12                 | PLG                     | PIK3CA                   |                         |
| TRAF2                      | CAMK2B      | FOXO3                                      | FOXO4                     | FGB                    | MEF2C                  | FGB                     | PIK3R1                   |                         |
| FOXO1                      | CAMK2D      | MAPK3                                      | PIK3CA                    | FGG                    | GSN                    | PLAT                    | MAPK1                    |                         |
| PLCG2                      | TP53        | PIK3CA                                     | PIK3R1                    | GATA3                  | MEF2D                  |                         |                          |                         |
| KIT                        | PIK3CA      | FASLG                                      | PPP2R1A                   | HSPA5                  | SORBS1                 |                         |                          |                         |
| SMAD2                      | PLCG2       | PIK3CG                                     | MAPK3                     | ARRB1                  | FGF2                   |                         |                          |                         |
| ERBB2                      | PIK3R1      | PIK3R1                                     | MAPK8                     | MYB                    | MEF2A                  |                         |                          |                         |
| RXRA                       |             |                                            | MAPK12                    | NRAS                   | CKB                    |                         |                          |                         |
| RET                        |             |                                            | STAT3                     | PIK3CA                 | PSEN2                  |                         |                          |                         |
| EGFR                       |             |                                            | BTK                       | PIK3R1                 | NOTCH1                 |                         |                          |                         |
| AR                         |             |                                            | UBE2A                     | PLAT                   | CAMK2B                 |                         |                          |                         |
| TP53                       |             |                                            | SUMO1                     | PPP2R5D                |                        |                         |                          |                         |
| PIK3CA                     |             |                                            | CAMK2A                    | PROC                   |                        |                         |                          |                         |
| KLK3                       |             |                                            | CAMK2B                    | RAP1A                  |                        |                         |                          |                         |
| FASLG                      |             |                                            | CAMK2D                    | TP53                   |                        |                         |                          |                         |
| IL6                        |             |                                            | CD28                      | YES1                   |                        |                         |                          |                         |
| PIK3R1                     |             |                                            | CD86                      |                        |                        |                         |                          |                         |
