# Supplementary material for: Combined use of protein biomarkers and network analysis unveils deregulated regulatory circuits in Duchenne muscular dystrophy
Source: PubMed Central journal article supplement (PMC5846794; doi:10.1371/journal.pone.0194225), 2018-03-12
Supplement: pone.0194225.s004.pdf [file pone.0194225.s004.pdf]

**Table S4.** Literature comparison. For all the proteins in the long biomarker panel the result of a literature search about DMD proteomics studies identifying the same protein is reported.

| <b>SYMBOL</b> | <b>Hathout et al, 2015</b> | <b>Coenen-Stass et al,2015</b> | <b>Ayoglu et al, 2014</b> | <b>Hathout et al, 2014</b> | <b>Cynthia Martin et al, 2014</b> |
|---------------|----------------------------|--------------------------------|---------------------------|----------------------------|-----------------------------------|
| CA3           | yes                        | -                              | yes                       | -                          | -                                 |
| MAPK12        | yes                        | -                              | -                         | -                          | -                                 |
| TNNI2         | yes                        | yes                            | -                         | -                          | -                                 |
| CKM           | yes                        | -                              | yes                       | yes                        | -                                 |
| CKB           | -                          | -                              | yes                       | -                          | -                                 |
| RET           | yes                        | -                              | -                         | -                          | -                                 |
| GPI           | yes                        | -                              | -                         | -                          | -                                 |
| MB            | yes                        | yes                            | -                         | yes                        | -                                 |
| CAMK2A        | yes                        | yes                            | -                         | -                          | -                                 |
| FABP3         | yes                        | yes                            | -                         | yes                        | -                                 |
| TNNI3         | yes                        | yes                            | -                         | -                          | -                                 |
| CDH5          | yes                        | -                              | -                         | -                          | -                                 |
| ANP32B        | yes                        | yes                            | -                         | -                          | -                                 |
| GPT           | yes                        | -                              | -                         | -                          | -                                 |
| FGG           | yes                        | -                              | -                         | yes                        | -                                 |
| FGA           | yes                        | -                              | -                         | -                          | -                                 |
| FGB           | yes                        | -                              | -                         | -                          | -                                 |
| CAMK2D        | -                          | yes                            | -                         | -                          | -                                 |
| CD55          | yes                        | -                              | -                         | -                          | -                                 |
| RPS7          | yes                        | -                              | -                         | -                          | -                                 |
| PIK3CA        | -                          | -                              | -                         | -                          | -                                 |
| PIK3R1        | -                          | -                              | -                         | -                          | -                                 |
| LDHB          | yes                        | yes                            | -                         | -                          | -                                 |
| RELT          | yes                        | -                              | -                         | -                          | -                                 |
| ENG           | -                          | -                              | -                         | -                          | -                                 |
| CAMK2B        | -                          | yes                            | -                         | -                          | -                                 |
| GSN           | yes                        | -                              | -                         | -                          | yes                               |
| CX3CL1        | -                          | -                              | -                         | -                          | -                                 |
| PLA2G2A       | yes                        | -                              | -                         | -                          | -                                 |
| DNAJC19       | -                          | -                              | -                         | -                          | -                                 |
| JAG1          | yes                        | -                              | -                         | -                          | -                                 |

|          |     |   |   |     |   |
|----------|-----|---|---|-----|---|
| PLAT     | -   | - | - | -   | - |
| KIT      | -   | - | - | -   | - |
| CD86     | -   | - | - | -   | - |
| CD200R1  | -   | - | - | -   | - |
| GDF11    | yes | - | - | -   | - |
| TNFRSF17 | -   | - | - | -   | - |
| PROC     | -   | - | - | -   | - |
| HDGFRP2  | yes | - | - | -   | - |
| ALCAM    | -   | - | - | -   | - |
| CD109    | -   | - | - | -   | - |
| CADM1    | -   | - | - | -   | - |
| NOTCH1   | -   | - | - | -   | - |
| IGF1R    | -   | - | - | -   | - |
| MDH1     | yes | - | - | yes | - |
| SEMA6A   | -   | - | - | -   | - |
| PSPN     | yes | - | - | -   | - |
| TPM2     | -   | - | - | -   | - |
| FAP      | yes | - | - | -   | - |
| EGFR     | -   | - | - | -   | - |
| IL18BP   | -   | - | - | -   | - |
| FASLG    | -   | - | - | -   | - |
