# Supplementary material for: Combined use of protein biomarkers and network analysis unveils deregulated regulatory circuits in Duchenne muscular dystrophy
Source: PubMed Central journal article supplement (PMC5846794; doi:10.1371/journal.pone.0194225), 2018-03-12
Supplement: pone.0194225.s005.pdf [file pone.0194225.s005.pdf]

**Table S5.** Gene-set enrichment analysis using the protein signature in Hathout et al.

| pathway source | ranking | pathway name                                                        | # genes in the signature | genes             | p-value     | BH adjusted p-value |
|----------------|---------|---------------------------------------------------------------------|--------------------------|-------------------|-------------|---------------------|
| biocarta       | 1       | BIOCARTA SARS PATHWAY                                               | 3                        | CKM, GPT, LDHB    | 0.000255205 | 0.055379442         |
| biocarta       | 2       | BIOCARTA FIBRINOLYSIS PATHWAY                                       | 3                        | FGA, FGB, FGG     | 0.004594291 | 0.498480617         |
| biocarta       | 3       | BIOCARTA EXTRINSIC PATHWAY                                          | 3                        | FGA, FGB, FGG     | 0.010974765 | 0.60567573          |
| biocarta       | 4       | BIOCARTA AMI PATHWAY                                                | 3                        | FGA, FGB, FGG     | 0.01116453  | 0.60567573          |
| biocarta       | 5       | BIOCARTA INTRINSIC PATHWAY                                          | 3                        | FGA, FGB, FGG     | 0.017470808 | 0.758233056         |
| biocarta       | 6       | BIOCARTA KREB PATHWAY                                               | 1                        | MDH1              | 0.041255605 | 1                   |
| biocarta       | 7       | BIOCARTA PROTEASOME PATHWAY                                         | 1                        | PSMA2             | 0.120701763 | 1                   |
| biocarta       | 8       | BIOCARTA RHO PATHWAY                                                | 1                        | GSN               | 0.121125011 | 1                   |
| biocarta       | 9       | BIOCARTA SET PATHWAY                                                | 1                        | SET               | 0.155284288 | 1                   |
| biocarta       | 10      | BIOCARTA GLYCOLYSIS PATHWAY                                         | 1                        | GPI               | 0.189945879 | 1                   |
| KEGG           | 1       | KEGG PYRUVATE METABOLISM                                            | 2                        | MDH1, LDHB        | 0.005136974 | 0.763515876         |
| KEGG           | 2       | KEGG ARGININE AND PROLINE METABOLISM                                | 2                        | CKM, ACY1         | 0.016561432 | 0.763515876         |
| KEGG           | 3       | KEGG OLFACTORY TRANSDUCTION                                         | 2                        | CAMK2A, PRKACA    | 0.021109432 | 0.763515876         |
| KEGG           | 4       | KEGG NOTCH SIGNALING PATHWAY                                        | 2                        | JAG1, NOTCH3      | 0.032410539 | 0.763515876         |
| KEGG           | 5       | KEGG GLYOXYLATE AND DICARBOXYLATE METABOLISM                        | 1                        | MDH1              | 0.041553749 | 0.763515876         |
| KEGG           | 6       | KEGG CITRATE CYCLE TCA CYCLE                                        | 1                        | MDH1              | 0.042163153 | 0.763515876         |
| KEGG           | 7       | KEGG PROPANOATE METABOLISM                                          | 1                        | LDHB              | 0.042201835 | 0.763515876         |
| KEGG           | 8       | KEGG STARCH AND SUCROSE METABOLISM                                  | 1                        | GPI               | 0.042950514 | 0.763515876         |
| KEGG           | 9       | KEGG TASTE TRANSDUCTION                                             | 1                        | PRKACA            | 0.042950514 | 0.763515876         |
| KEGG           | 10      | KEGG GLYCOLYSIS GLUCONEOGENESIS                                     | 2                        | GPI, LDHB         | 0.043074044 | 0.763515876         |
| Reactome       | 1       | REACTOME GLUCONEOGENESIS                                            | 3                        | GPI, MDH1, PRKACA | 0.003345861 | 0.863673332         |
| Reactome       | 2       | REACTOME GRB2 SOS PROVIDES LINKAGE TO MAPK SIGNALING FOR INTERGRINS | 3                        | FGA, FGB, FGG     | 0.004629262 | 0.863673332         |
| Reactome       | 3       | REACTOME GLUCOSE                                                    | 3                        | GPI, MDH1,        | 0.005324149 | 0.863673332         |

|                            |    |                                                                                              |   |                                    |             |             |
|----------------------------|----|----------------------------------------------------------------------------------------------|---|------------------------------------|-------------|-------------|
|                            |    | METABOLISM                                                                                   |   | PRKACA                             |             |             |
| Reactome                   | 4  | REACTOME COMMON PATHWAY                                                                      | 3 | FGA, FGB, FGG                      | 0.006391066 | 0.863673332 |
| Reactome                   | 5  | REACTOME P130CAS LINKAGE TO MAPK SIGNALING FOR INTEGRINS                                     | 3 | FGA, FGB, FGG                      | 0.006407072 | 0.863673332 |
| Reactome                   | 6  | REACTOME STRIATED MUSCLE CONTRACTION                                                         | 2 | TNNI2, TNNI3                       | 0.009750179 | 1           |
| Reactome                   | 7  | REACTOME SIGNALING BY NOTCH3                                                                 | 2 | JAG1, NOTCH3                       | 0.015385376 | 1           |
| Reactome                   | 8  | REACTOME INTEGRIN ALPHAIIIB BETA3 SIGNALING                                                  | 3 | FGA, FGB, FGG                      | 0.017639993 | 1           |
| Reactome                   | 9  | REACTOME MUSCLE CONTRACTION                                                                  | 2 | TNNI2, TNNI3                       | 0.023872475 | 1           |
| Reactome                   | 10 | REACTOME RECEPTOR LIGAND BINDING INITIATES THE SECOND PROTEOLYTIC CLEAVAGE OF NOTCH RECEPTOR | 2 | JAG1, NOTCH3                       | 0.030542321 | 1           |
| MSigDB hallmark collection | 1  | HALLMARK MYOGENESIS                                                                          | 6 | TNNI2, FABP3, CKM, MAPK12, MB, GSN | 0.004986277 | 0.133309521 |
| MSigDB hallmark collection | 2  | HALLMARK OXIDATIVE PHOSPHORYLATION                                                           | 3 | GPI, MDH1, LDHB                    | 0.005332381 | 0.133309521 |
| MSigDB hallmark collection | 3  | HALLMARK NOTCH SIGNALING                                                                     | 2 | JAG1, NOTCH3                       | 0.031589493 | 0.526491545 |
| MSigDB hallmark collection | 4  | HALLMARK WNT BETA CATENIN SIGNALING                                                          | 1 | JAG1                               | 0.22917668  | 1           |
| MSigDB hallmark collection | 5  | HALLMARK UV RESPONSE UP                                                                      | 2 | PRKACA, RET                        | 0.291353281 | 1           |
| MSigDB hallmark collection | 6  | HALLMARK SPERMATOGENESIS                                                                     | 1 | TNNI3                              | 0.347750343 | 1           |
| MSigDB hallmark collection | 7  | HALLMARK HEDGEHOG SIGNALING                                                                  | 1 | UNC5C                              | 0.349867886 | 1           |
| MSigDB hallmark collection | 8  | HALLMARK INTERFERON ALPHA RESPONSE                                                           | 1 | CXCL10                             | 0.366603542 | 1           |
| MSigDB hallmark collection | 9  | HALLMARK KRAS SIGNALING DN                                                                   | 2 | TNNI3, CKM                         | 0.380315592 | 1           |
| MSigDB hallmark collection | 10 | HALLMARK CHOLESTEROL HOMEOSTASIS                                                             | 1 | JAG1                               | 0.387907404 | 1           |
