# Supplementary material for: Combined use of protein biomarkers and network analysis unveils deregulated regulatory circuits in Duchenne muscular dystrophy
Source: PubMed Central journal article supplement (PMC5846794; doi:10.1371/journal.pone.0194225), 2018-03-12
Supplement: pone.0194225.s006.pdf [file pone.0194225.s006.pdf]

**Table S6.** NASFinder results obtained using the protein signature in Hathout et al.

| <b>pathway</b>                           | <b>regulator</b> | <b># genes in the sub-network</b> | <b># pathway overlapping genes</b> | <b>p-value</b> |
|------------------------------------------|------------------|-----------------------------------|------------------------------------|----------------|
| KEGG COMPLEMENT AND COAGULATION CASCADES | RXRA             | 61                                | 4                                  | 0.00438532     |
| KEGG GNRH SIGNALING                      | IRF3             | 62                                | 7                                  | 5.30645E-05    |
| KEGG MAPK SIGNALING                      | MEF2C            | 83                                | 12                                 | 0.000163905    |
| KEGG NOTCH SIGNALING                     | RBPJ             | 39                                | 12                                 | 2.62209E-17    |
| REACTOME IMMUNE SYSTEM                   | IRF3             | 62                                | 25                                 | 6.82673E-07    |
| REACTOME HEMOSTASIS                      | TP53             | 70                                | 12                                 | 0.004442398    |
| REACTOME METABOLISM OF CARBOHYDRATES     | SMAD3            | 90                                | 4                                  | 0.468561958    |
| HALLMARK MYOGENESIS                      | MEF2C            | 83                                | 9                                  | 0.001143349    |
| HALLMARK COAGULATION                     | IRF3             | 62                                | 3                                  | 0.153354909    |
| HALLMARK UV RESPONSE UP                  | EIF2S3           | 46                                | 3                                  | 0.106985225    |
| BIOCARTA FIBRINOLYSIS                    | HIF1A            | 78                                | 4                                  | 1.38E-05       |
| BIOCARTA SARS                            | SMAD1            | 70                                | 3                                  | 0.000198       |
