# Supplementary material for: Combined use of protein biomarkers and network analysis unveils deregulated regulatory circuits in Duchenne muscular dystrophy
Source: PubMed Central journal article supplement (PMC5846794; doi:10.1371/journal.pone.0194225), 2018-03-12
Supplement: pone.0194225.s008.pdf [file pone.0194225.s008.pdf]

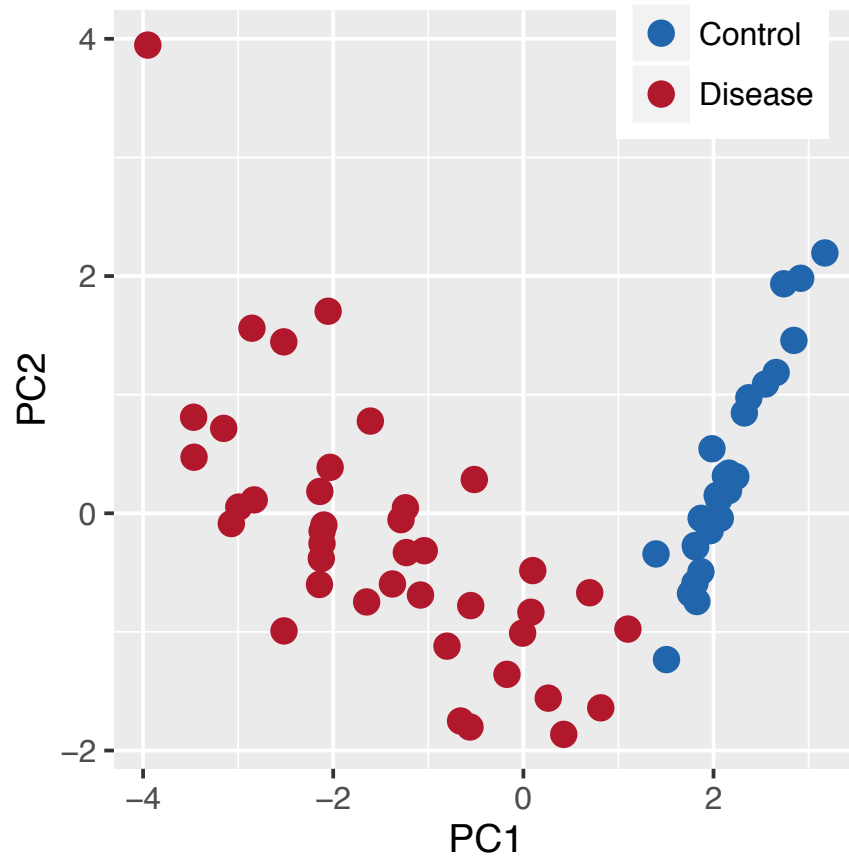

**Figure S1.** Principal Component Analysis of a subset of the DMD dataset that includes only the 6 proteins in the short biomarker panel.
