# Supplementary material for: Combined use of protein biomarkers and network analysis unveils deregulated regulatory circuits in Duchenne muscular dystrophy
Source: PubMed Central journal article supplement (PMC5846794; doi:10.1371/journal.pone.0194225), 2018-03-12
Supplement: pone.0194225.s009.pdf [file pone.0194225.s009.pdf]

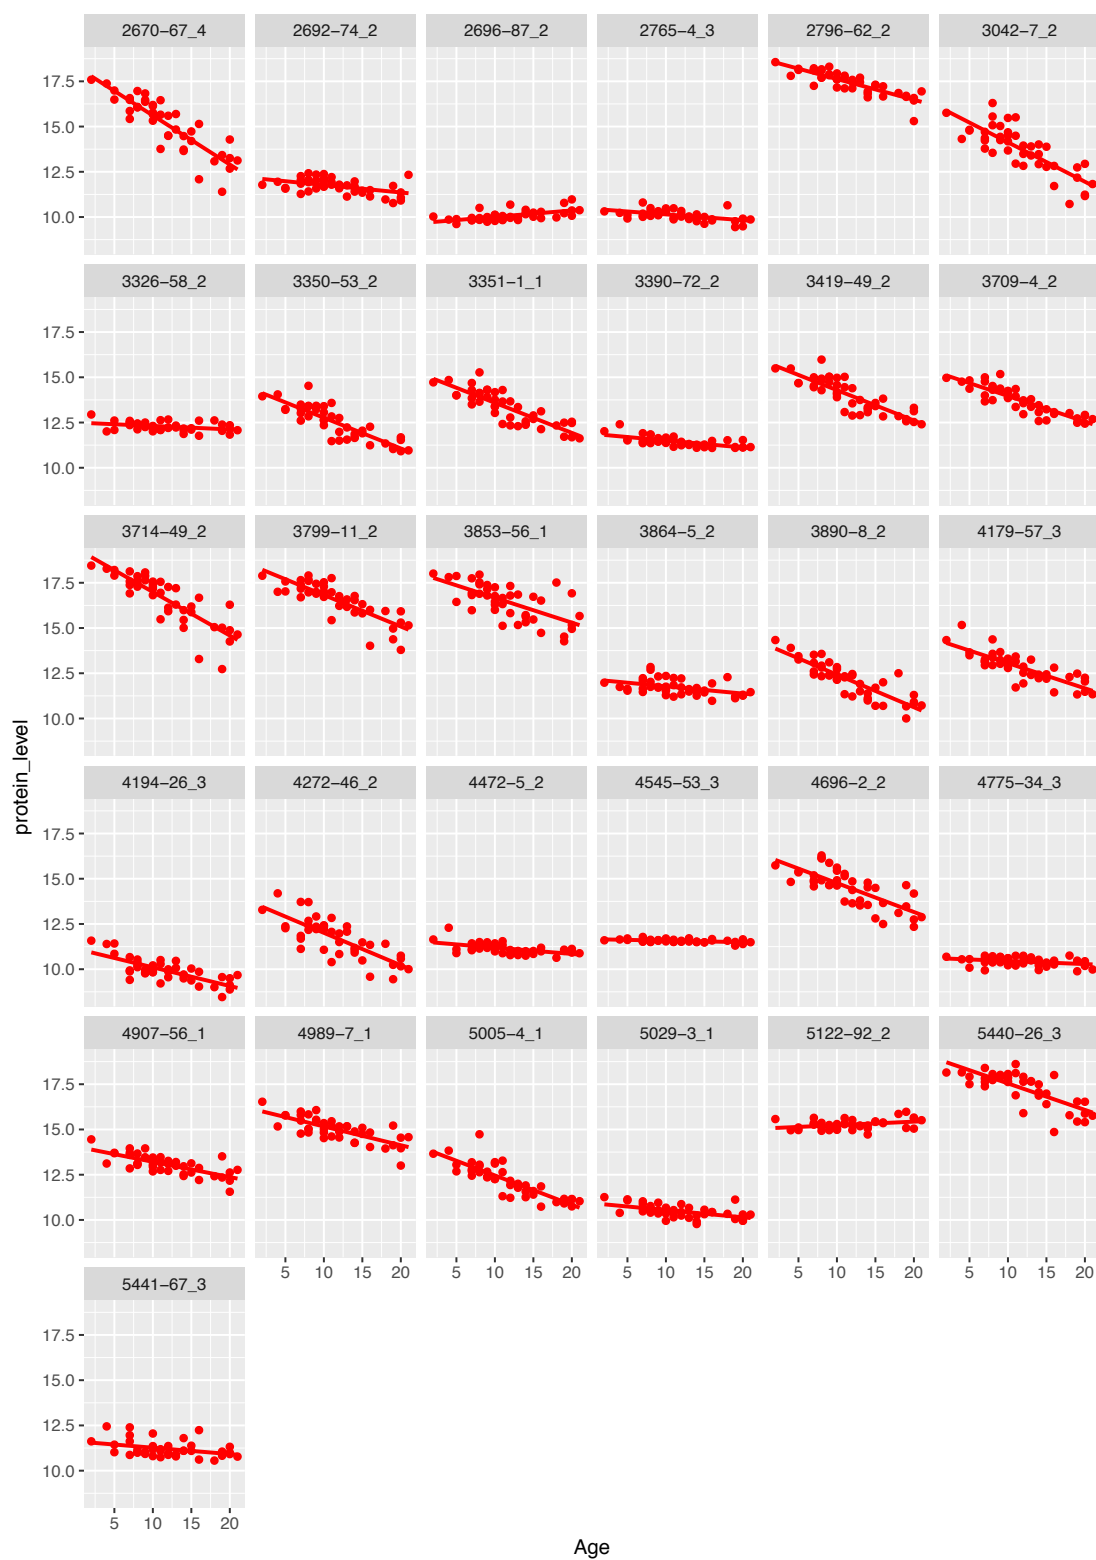

**Figure S2.** Age-related protein level variation in DMD subjects. The plots show all the proteins in the long biomarker panel showing a significant correlation with age.
