# Supplementary material for: Combined use of protein biomarkers and network analysis unveils deregulated regulatory circuits in Duchenne muscular dystrophy
Source: PubMed Central journal article supplement (PMC5846794; doi:10.1371/journal.pone.0194225), 2018-03-12
Supplement: pone.0194225.s011.pdf [file pone.0194225.s011.pdf]

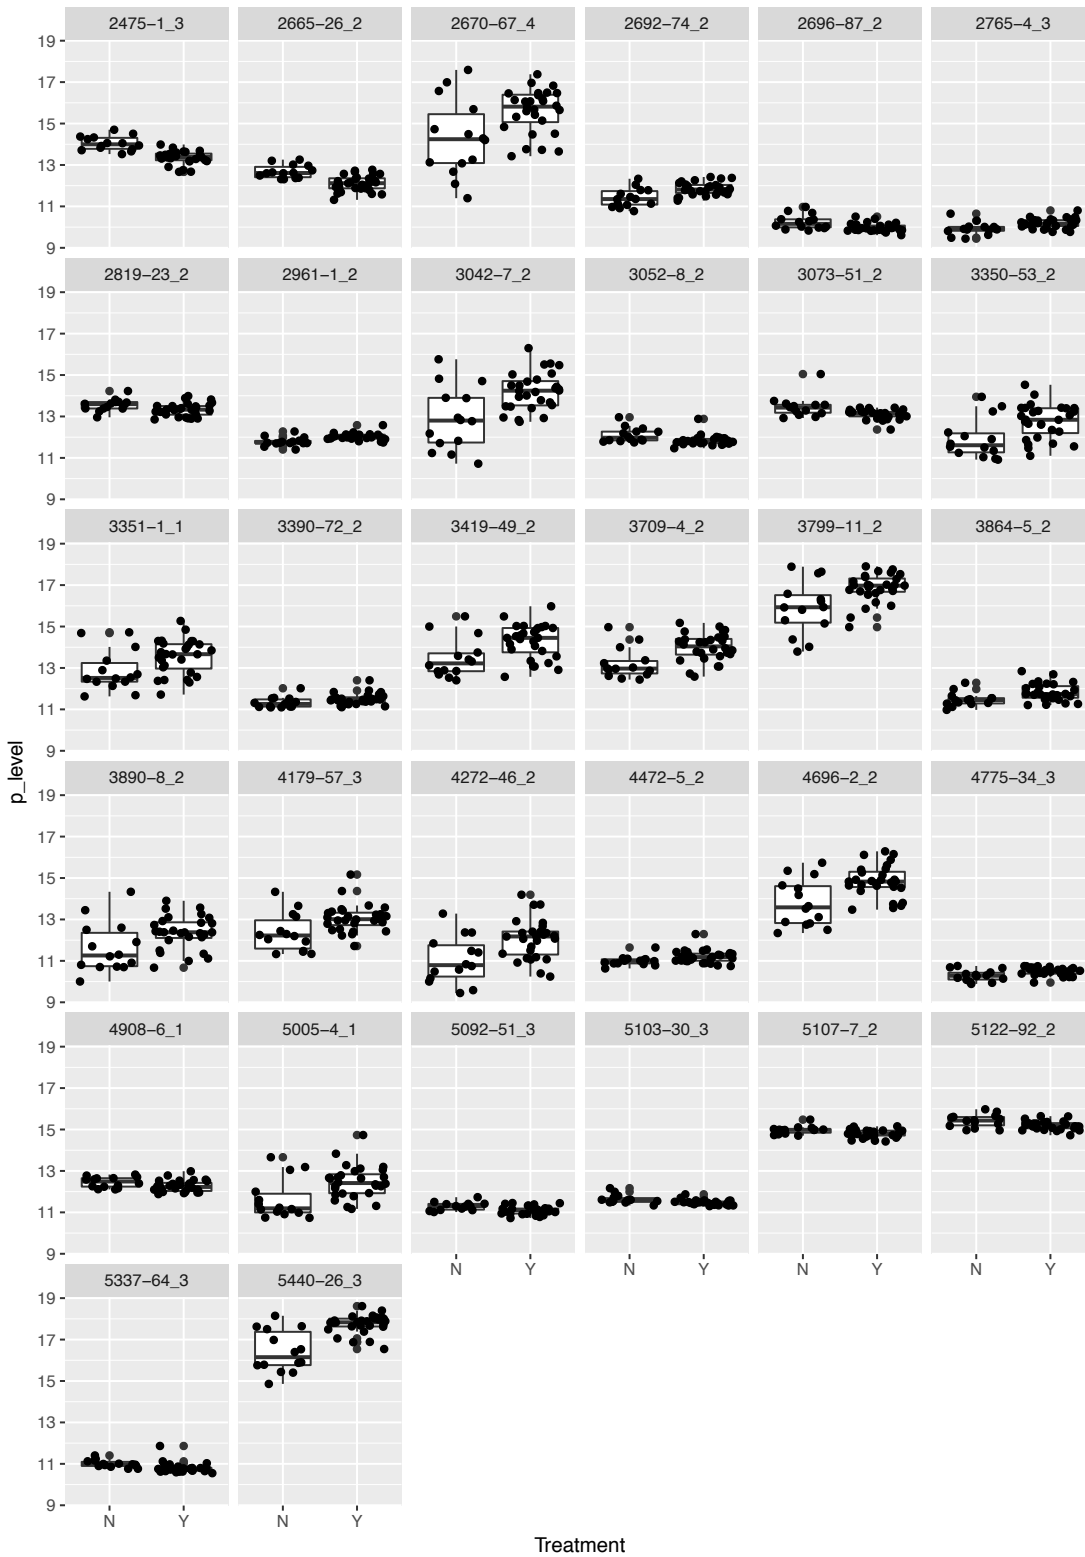

**Figure S4.** Charts showing the treatment effect in patients. Only the proteins in the long biomarker panel with a significant difference are shown.
